# Supplementary material for: Rational design of hydrogen bonds for driving thermo-responsive phase transition and assembly behavior of block copolymer in water
Source: Royal Society of Chemistry journal article supplement (doi:10.1039/d1py01578h), 2022-01-01
Supplement: d1py01578h1.pdf [file d1py01578h1.pdf]

## Supplementary Information

### **Rational Design of Hydrogen Bonds for Driving Thermo-responsive Phase Transition and Assembly Behavior of Block Copolymer in Water**

Huiling Lan<sup>a</sup>, Yuanyuan Liu<sup>a</sup>, Yanli Mao<sup>b,\*</sup>, Juan Han<sup>c</sup>, Yu Wang<sup>a</sup>, Yun Wang<sup>a</sup>, Lei Wang<sup>a,\*</sup>

<sup>a</sup> School of Chemistry and Chemical Engineering, Jiangsu University, 212013 Zhenjiang, China

<sup>b</sup> Henan Key Laboratory of Water Pollution Control and Rehabilitation Technology, Henan University of Urban Construction, 467036 Pingdingshan, China

<sup>c</sup> School of Food and Biological Engineering, Jiangsu University, 212013 Zhenjiang, China

\* Corresponding author: Yanli Mao, E-mail: myanliao@163.com

\* Corresponding author: Lei Wang, E-mail: wanglei86@ujs.edu.cn

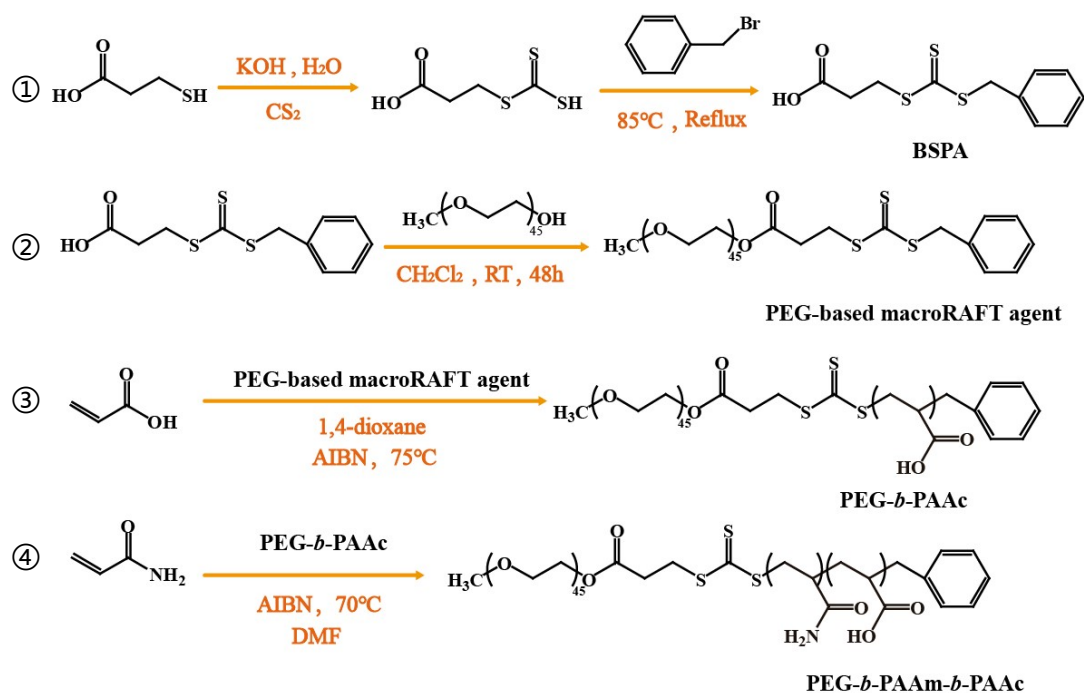

**Scheme S1** Schematic illustration of the preparation of PEG-*b*-PAAm-*b*-PAAc block copolymer.

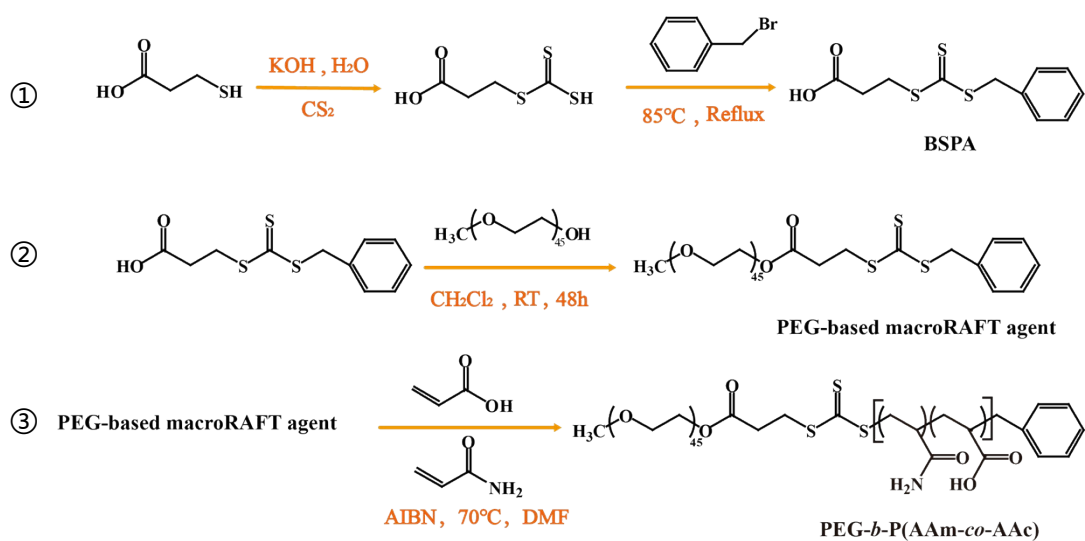

**Scheme S2** Schematic illustration of the preparation of PEG-*b*-P(AAm-*co*-AAc) random copolymer.

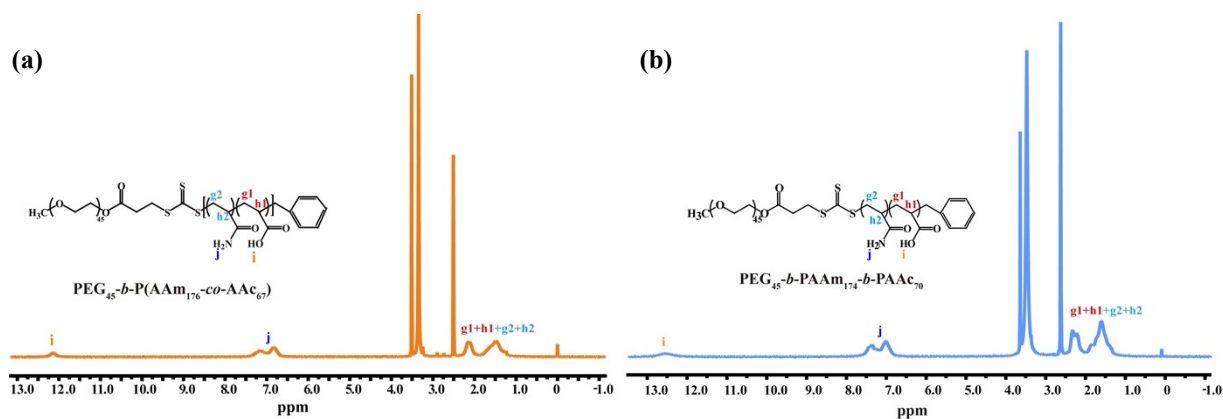

**Fig. S1**  $^1\text{H}$  NMR spectra of  $\text{PEG}_{45}\text{-}b\text{-P}(\text{AAm}_{176}\text{-}co\text{-AAc}_{67})$  random copolymer and  $\text{PEG}_{45}\text{-}b\text{-PAAm}_{174}\text{-}b\text{-PAAC}_{70}$  block copolymer.

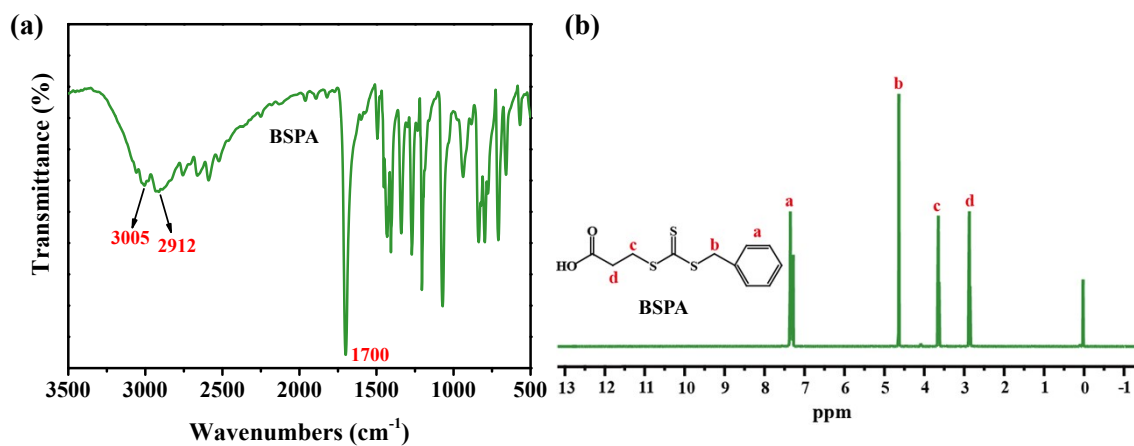

**Fig. S2** (a) FT-IR spectra of BSPA; (b)  $^1\text{H}$  NMR spectra of BSPA.

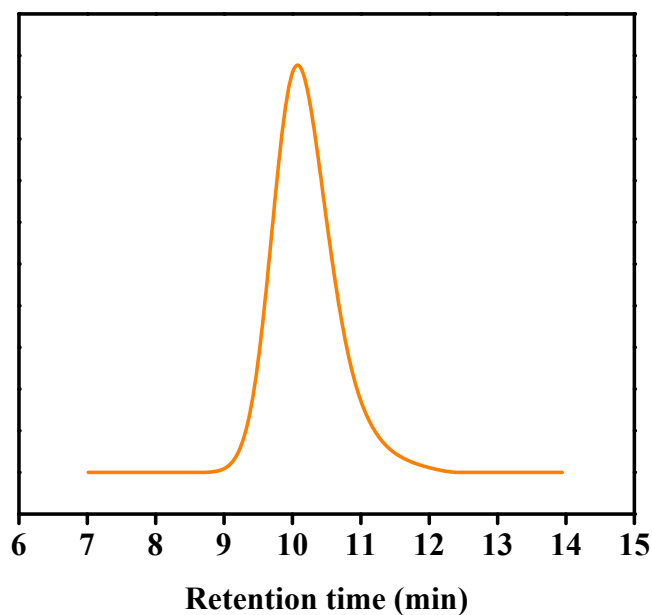

**Fig. S3** Size exclusion chromatography (SEC) spectra of  $\text{PEG}_{45}\text{-}b\text{-PAAm}_{178}\text{-}b\text{-PAAC}_{134}$ .

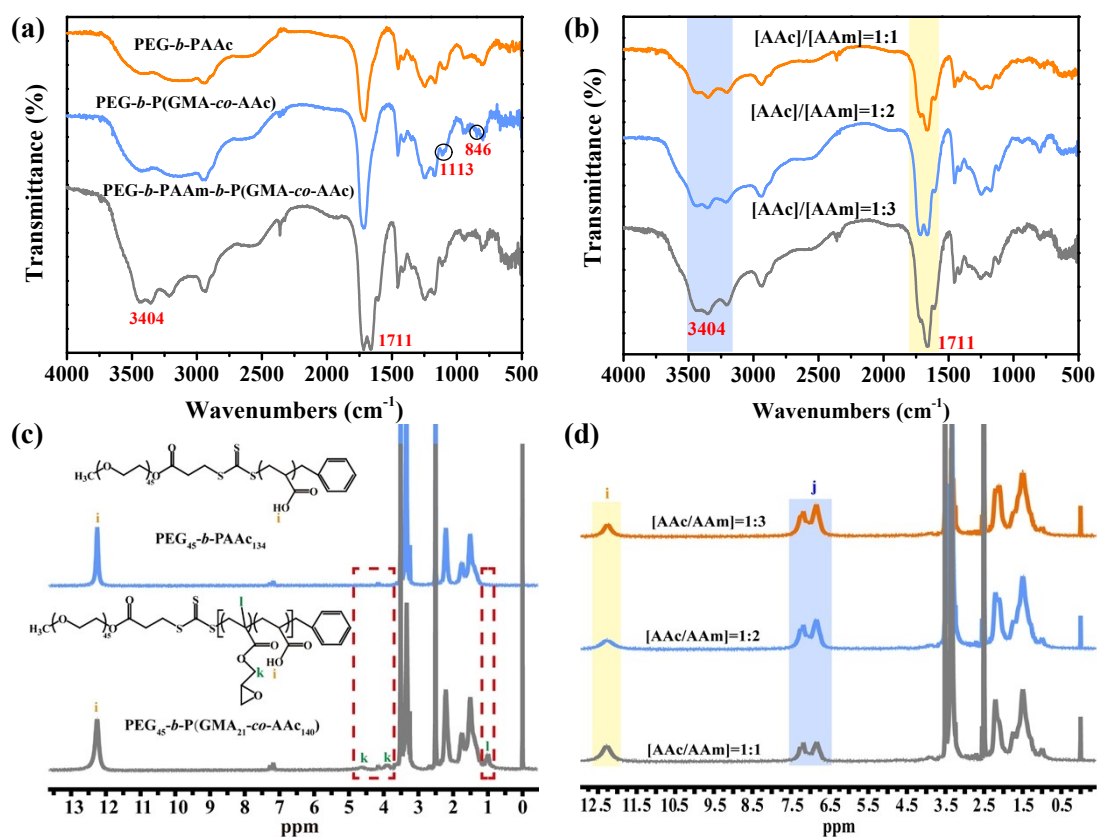

**Fig. S4** (a) FTIR spectra of PEG-*b*-PAAc, PEG-*b*-P(AAc-*co*-GMA), PEG-*b*-PAAm-*b*-P(AAc-*co*-GMA); (b) FTIR spectra of PEG-*b*-PAAm-*b*-P(AAc-*co*-GMA) with different feed ratios of AAc and AAm (1:1, 1:2 and 1:3); (c) <sup>1</sup>H NMR spectra of PEG<sub>45</sub>-PAAc<sub>134</sub>, PEG<sub>45</sub>-*b*-P(AAc<sub>140</sub>-*co*-GMA<sub>21</sub>); (d) <sup>1</sup>H NMR spectra of PEG-*b*-PAAm-*b*-P(AAc-*co*-GMA) with different feed ratios of AAc and AAm (1:1, 1:2 and 1:3).

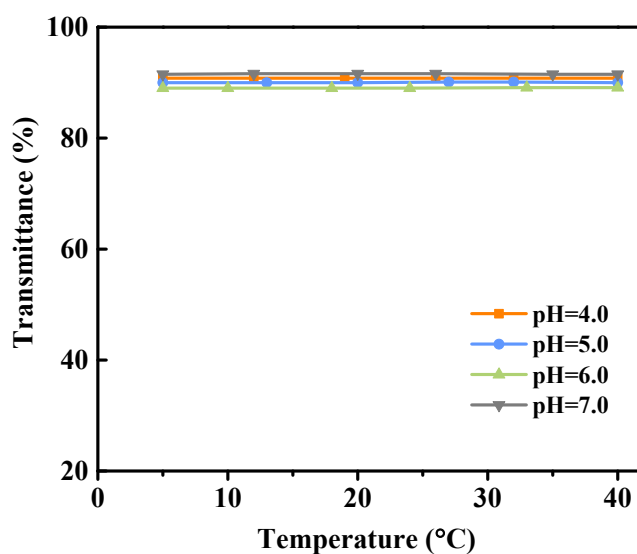

**Fig. S5** Temperature-dependent transmittance of 5 mg/ml PEG<sub>45</sub>-*b*-PAAm<sub>178</sub>-*b*-PAAc<sub>134</sub> aqueous solutions at 500 nm at different pH values.

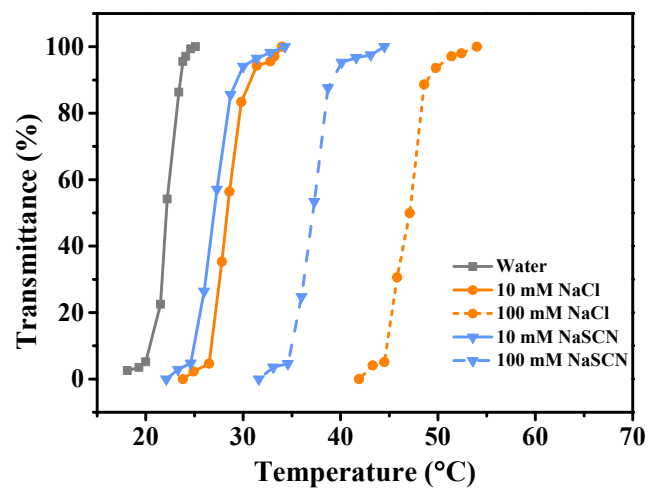

**Fig. S6** Salt-dependent UCST behaviour of PEG<sub>45</sub>-*b*-PAAm<sub>176</sub>-*b*-P(AAc<sub>140</sub>-*co*-GMA<sub>21</sub>) block copolymer measured at 500 nm.
